# Supplementary material
Source: JCI journal article supplement (doi:10.1172/jci181937)

# Original Immunoblots

Figure 1A

## SDCBP

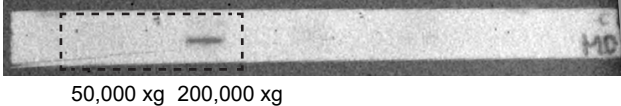

## PSMA3

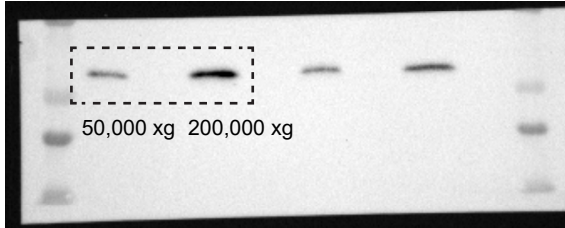

## LG3

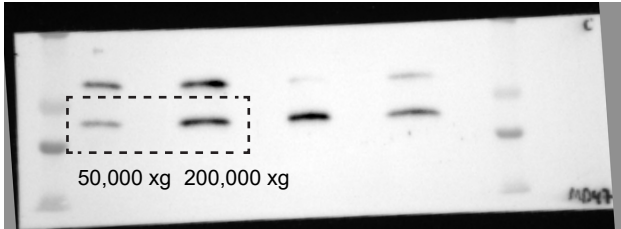

## H3C1

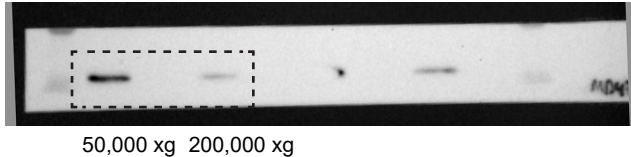

# Original Immunoblots

Figure 3  
MECA-32

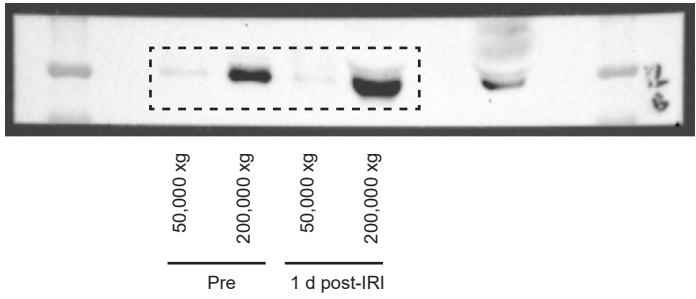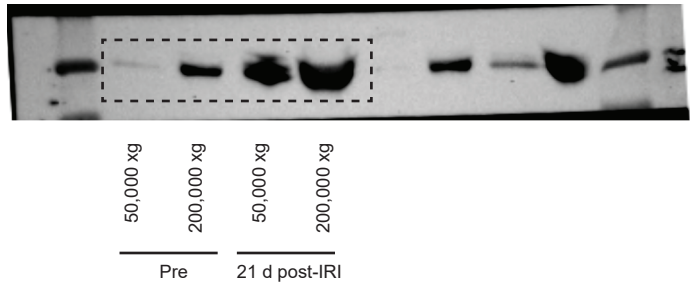

## B-actin

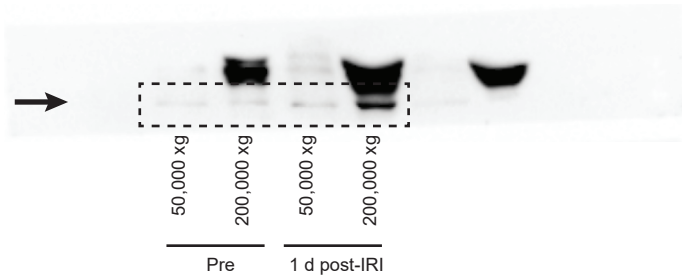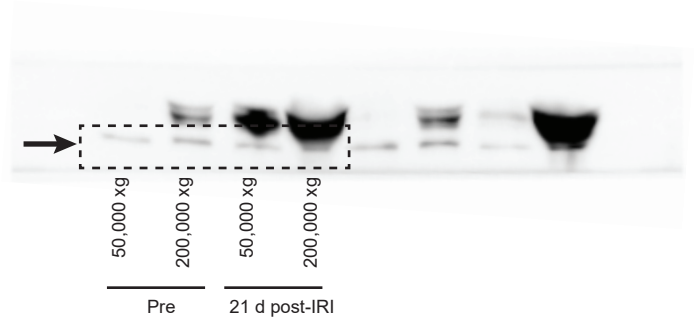

## CD82

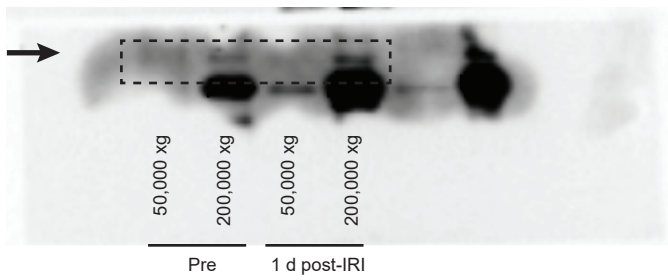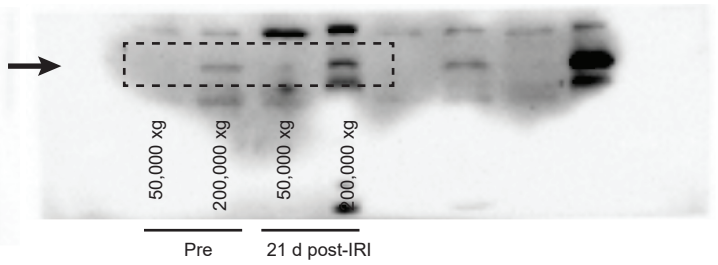

## 20S Proteasome

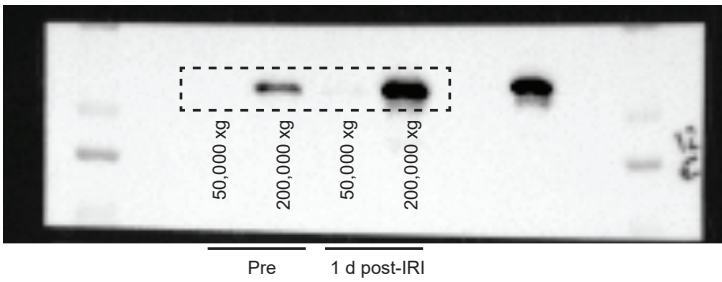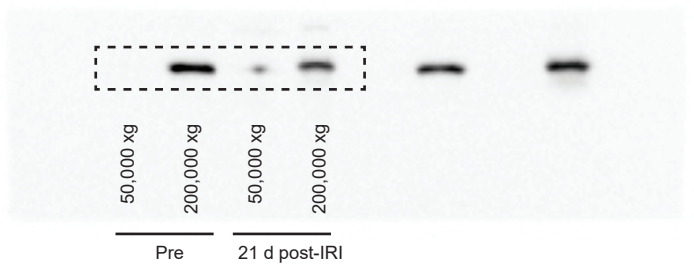

## LG3

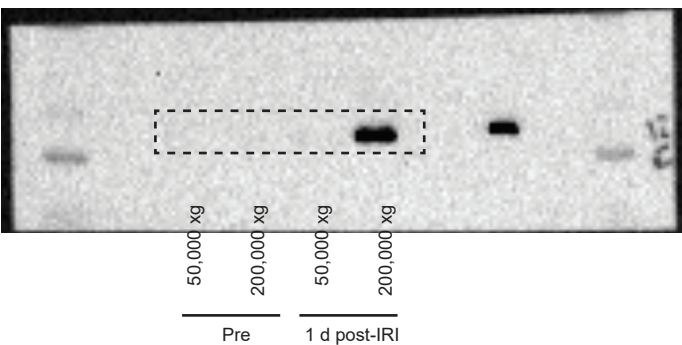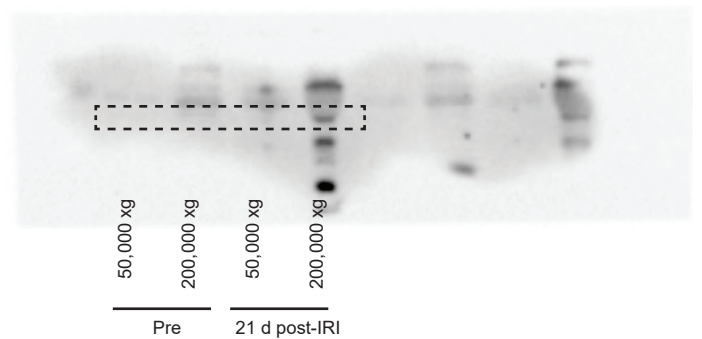

# Original Immunoblots

Figure 5  
CD31

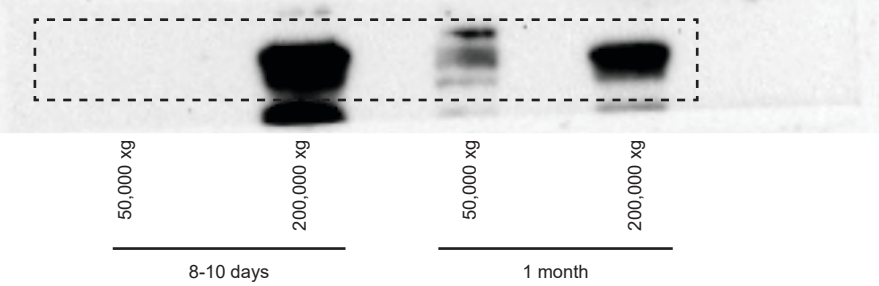

## B-actin

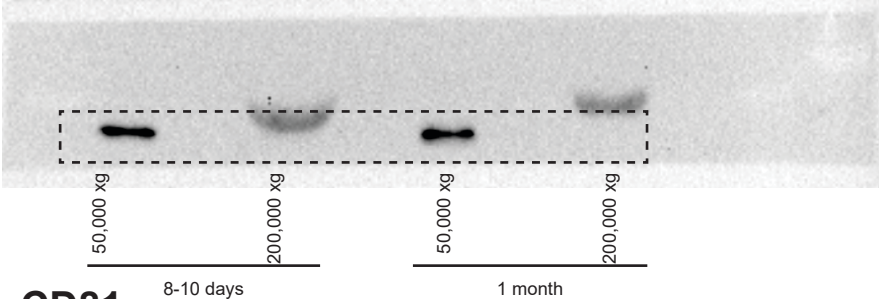

## CD81

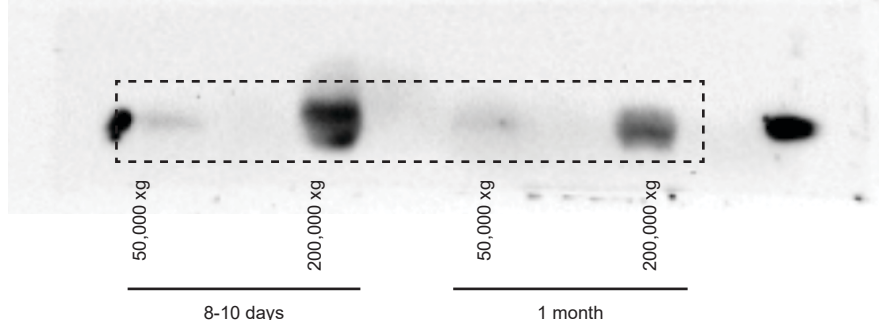

## 20S Proteasome

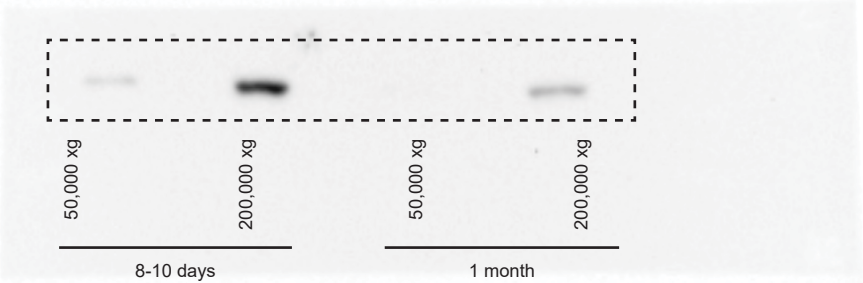

## LG3

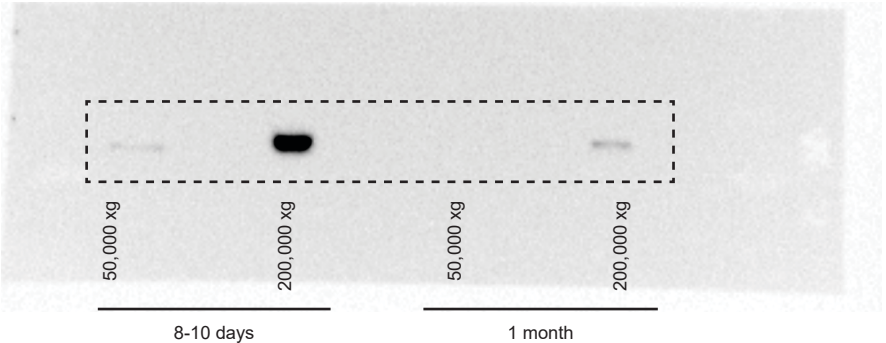

# Original Immunoblots

Figure 8

## Cleaved PARP

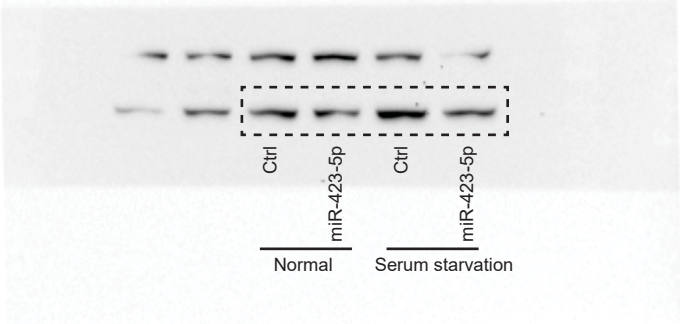

## $\alpha$ -tubulin

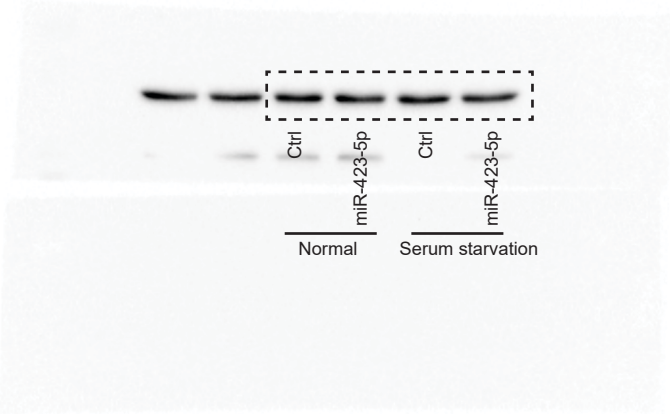



# Original Immunoblots

Figure S3G

MECA-32

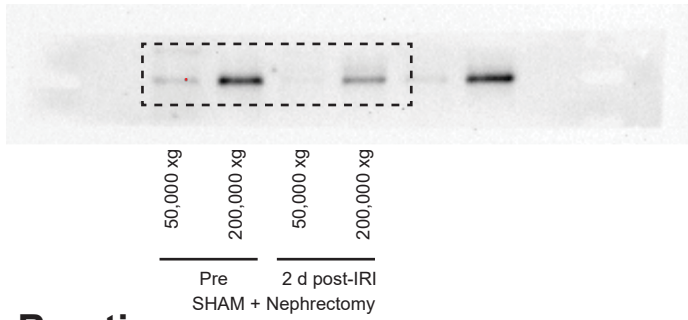

**B-actin**

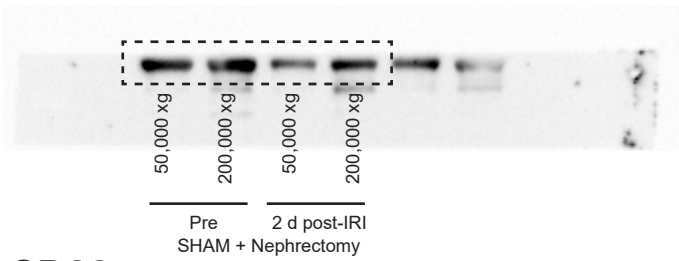

**CD82**

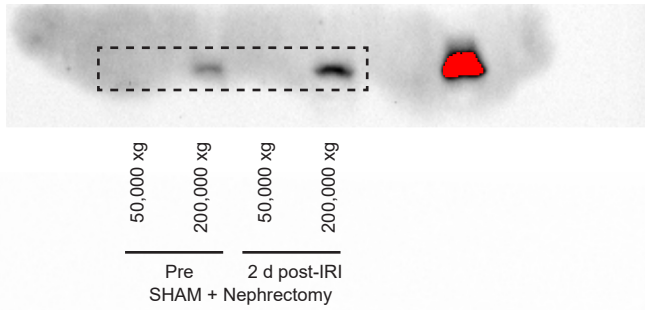

**20S Proteasome**

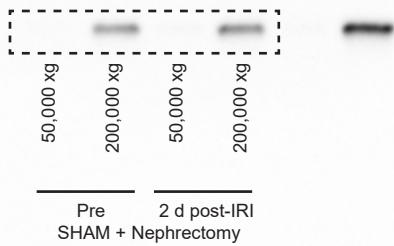

**LG3**

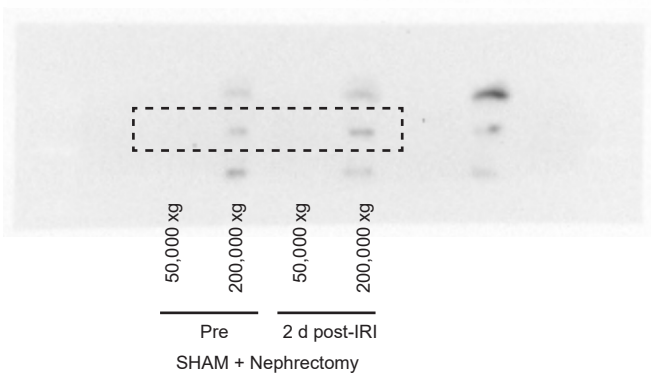

Supplement: sd2 [file 2]
